# Supplementary material for: The In Vitro Impact of Isoxazole Derivatives on Pathogenic Biofilm and Cytotoxicity of Fibroblast Cell Line
Source: MDPI journal article supplement (doi:10.3390/ijms24032997), 2023-02-03
Supplement: s1 [file s1]

# The Impact of Isoxazole Derivatives on Pathogenic Biofilm and Cytotoxicity of Fibroblast Cell Line

Urszula Bąchor <sup>1</sup>, Adam Junka <sup>2,\*</sup>, Malwina Brożyna <sup>2</sup> and Marcin Mączyński <sup>1</sup>

<sup>1</sup> Department of Organic Chemistry and Drug Technology, Faculty of Pharmacy, Wrocław Medical University, 50-556 Wrocław, Poland

<sup>2</sup> Department of Pharmaceutical Microbiology and Parasitology, Unique Application Model Laboratory, Faculty of Pharmacy, Wrocław Medical University, 50-556 Wrocław, Poland

\* Correspondence: adam.junka@umw.edu.pl; Tel.: +48-71-784-06-75

|                                                                  |    |
|------------------------------------------------------------------|----|
| Figure S1. $^1\text{H}$ NMR spectrum of compound MAL1.....       | 2  |
| Figure S2. $^{13}\text{C}$ NMR spectrum of compound MAL1.....    | 2  |
| Figure S3. ESI-MS spectrum of compound MAL1 .....                | 3  |
| Figure S4. $^1\text{H}$ NMR spectrum of compound MAL2.....       | 3  |
| Figure S5. $^{13}\text{C}$ NMR spectrum of compound MAL2.....    | 4  |
| Figure S6. ESI-MS spectrum of compound MAL2 .....                | 4  |
| Figure S7. $^1\text{H}$ NMR spectrum of compound MAL3.....       | 5  |
| Figure S8. $^{13}\text{C}$ NMR spectrum of compound MAL3.....    | 5  |
| Figure S9. ESI-MS spectrum of compound MAL3 .....                | 6  |
| Figure S10. $^1\text{H}$ NMR spectrum of compound MAL4.....      | 6  |
| Figure S11. $^{13}\text{C}$ NMR spectrum of compound MAL4 .....  | 7  |
| Figure S12. ESI-MS spectrum of compound MAL4 .....               | 7  |
| Figure S13. $^1\text{H}$ NMR spectrum of compound MAL5.....      | 8  |
| Figure S14. $^{13}\text{C}$ NMR spectrum of compound MAL5 .....  | 8  |
| Figure S15. ESI-MS spectrum of compound MAL5 .....               | 9  |
| Figure S16. $^1\text{H}$ NMR spectrum of compound PUB9 .....     | 9  |
| Figure S17. $^{13}\text{C}$ NMR spectrum of compound PUB9 .....  | 10 |
| Figure S18. ESI-MS spectrum of compound PUB9 .....               | 10 |
| Figure S19. $^1\text{H}$ NMR spectrum of compound PUB10 .....    | 11 |
| Figure S20. $^{13}\text{C}$ NMR spectrum of compound PUB10 ..... | 11 |
| Figure S21. ESI-MS spectrum of compound PUB10 .....              | 12 |

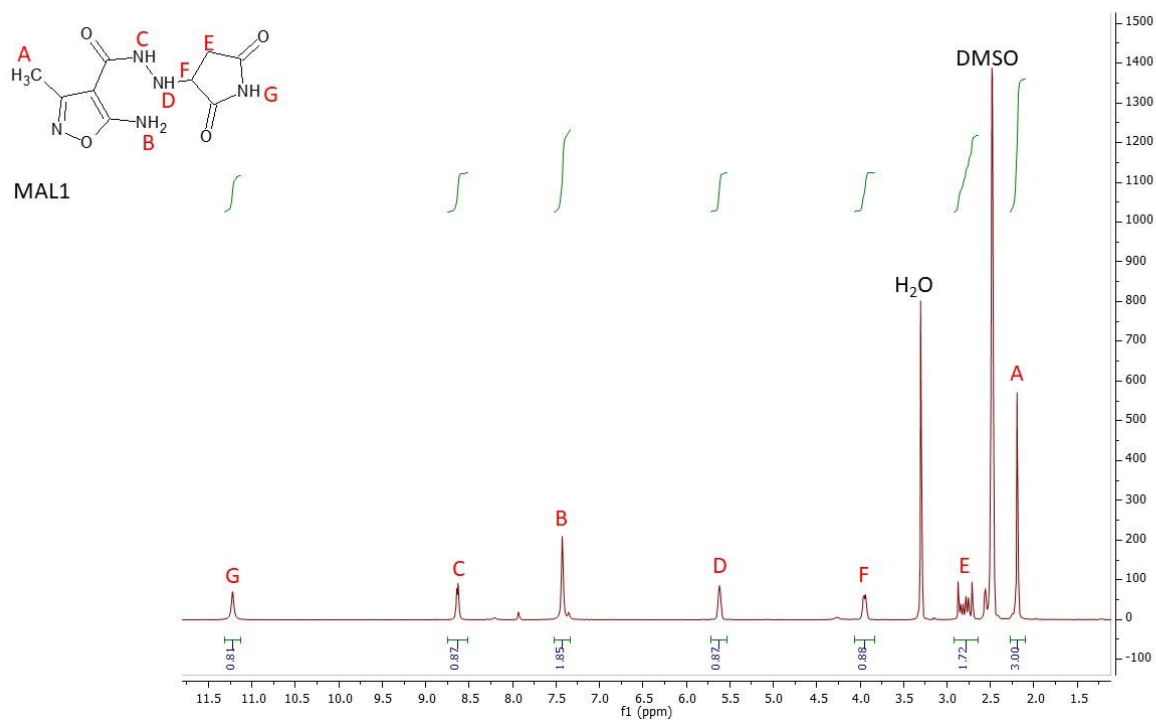

Figure S1. <sup>1</sup>H NMR spectrum of compound MAL1

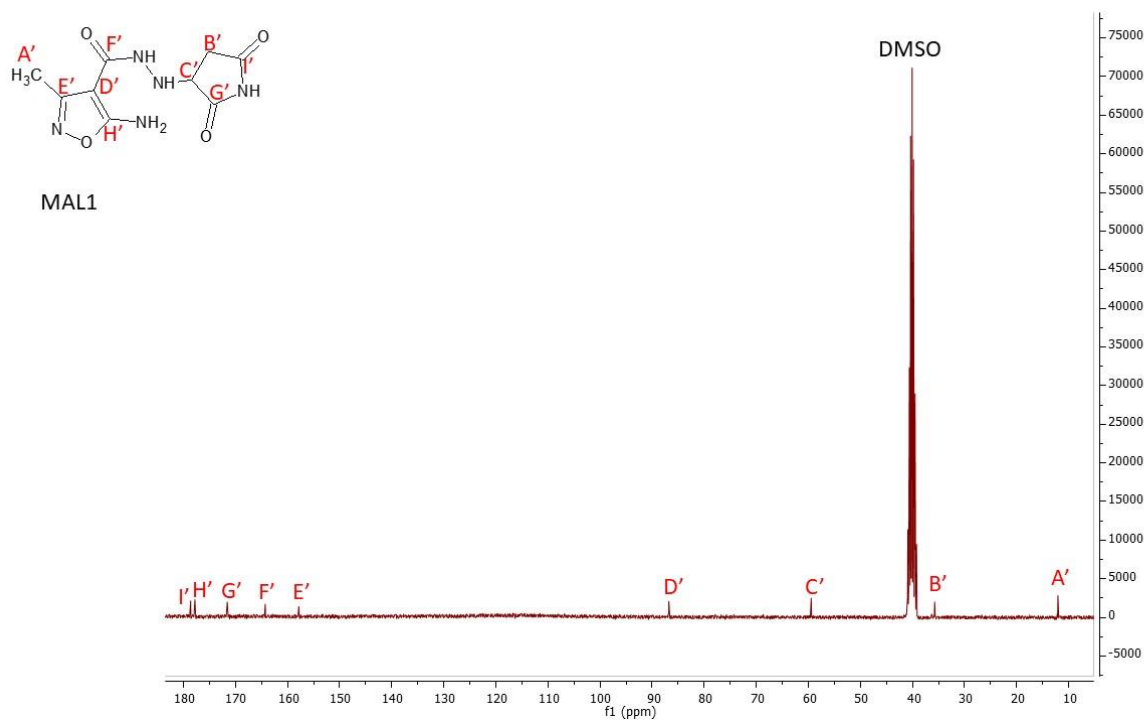

Figure S2. <sup>13</sup>C NMR spectrum of compound MAL1

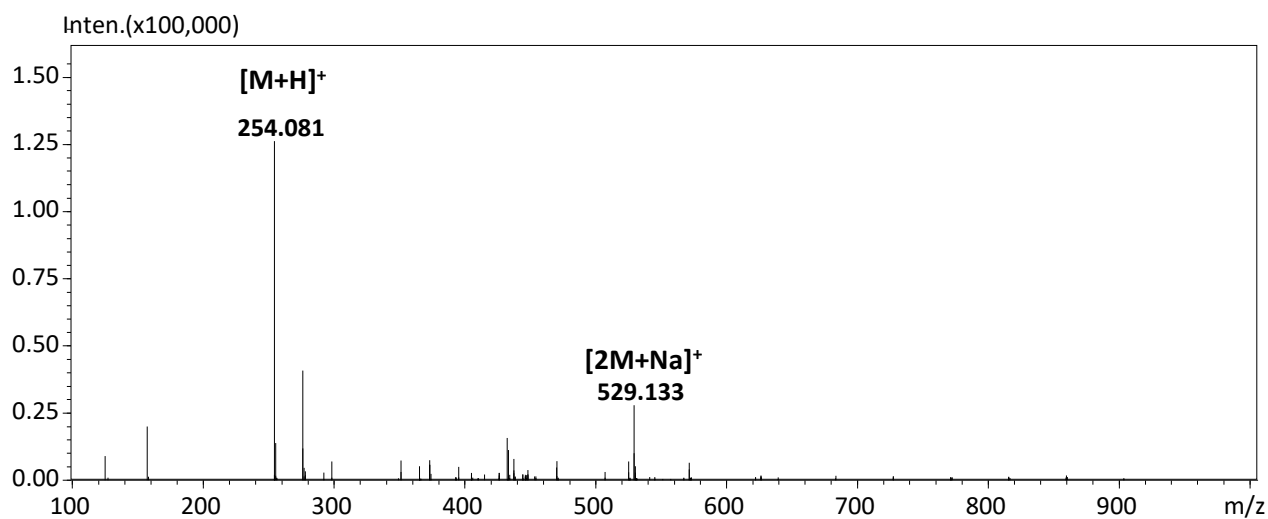

Figure S3. ESI-MS spectrum of compound MAL1

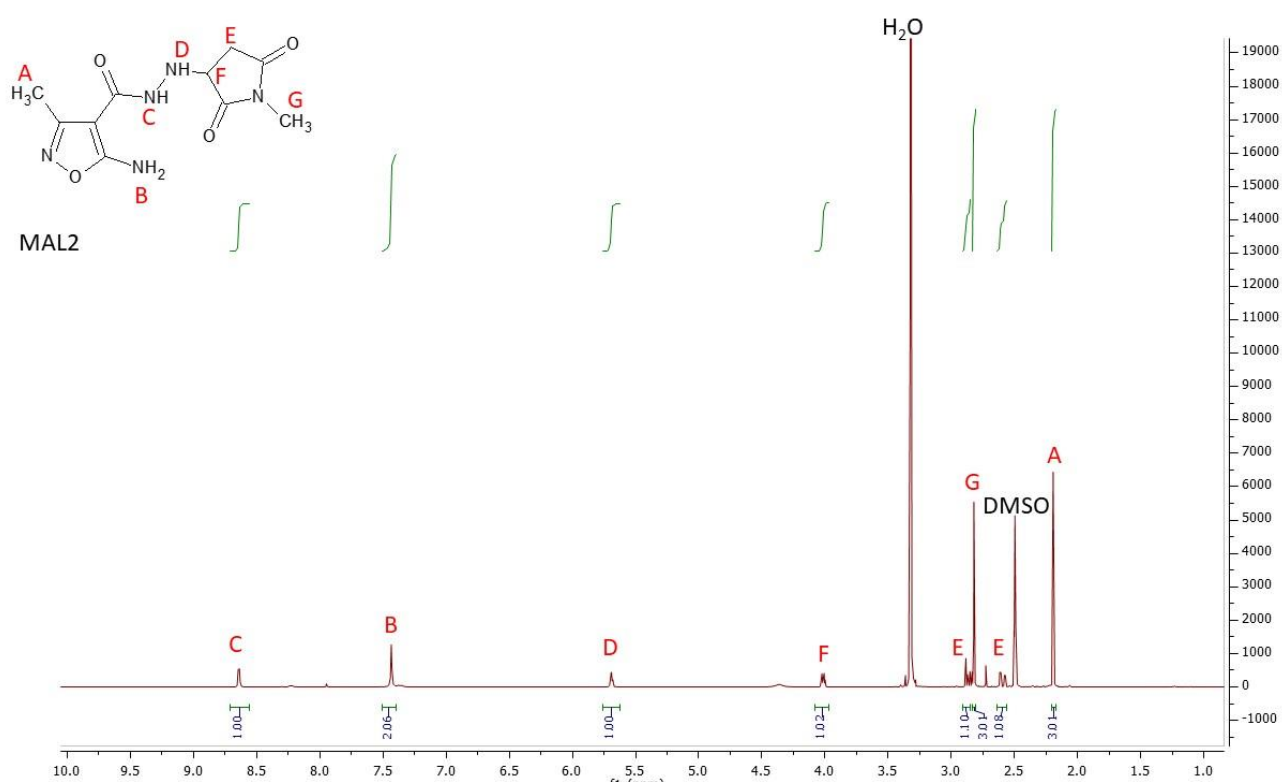

Figure S4.  $^1\text{H}$  NMR spectrum of compound MAL2

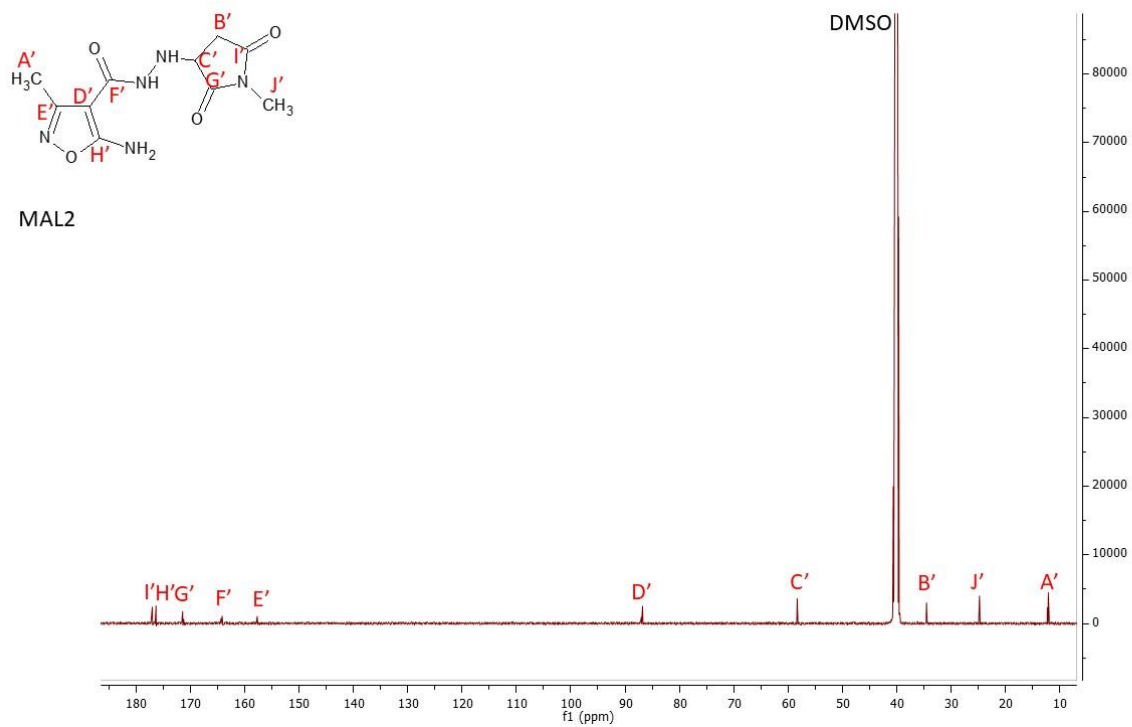

Figure S5.  $^{13}\text{C}$  NMR spectrum of compound MAL2

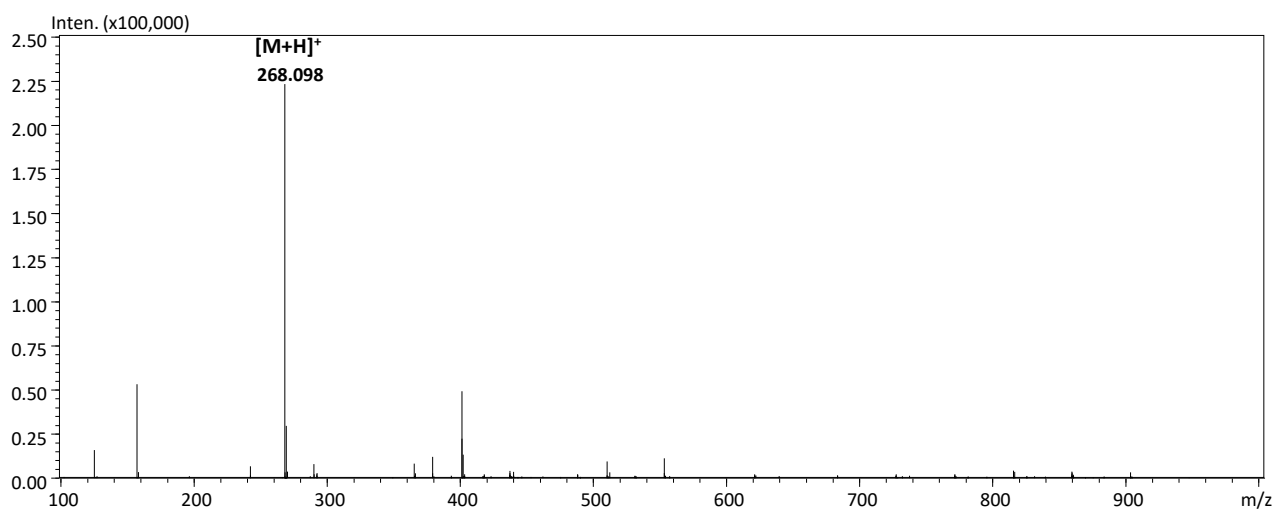

Figure S6. ESI-MS spectrum of compound MAL2

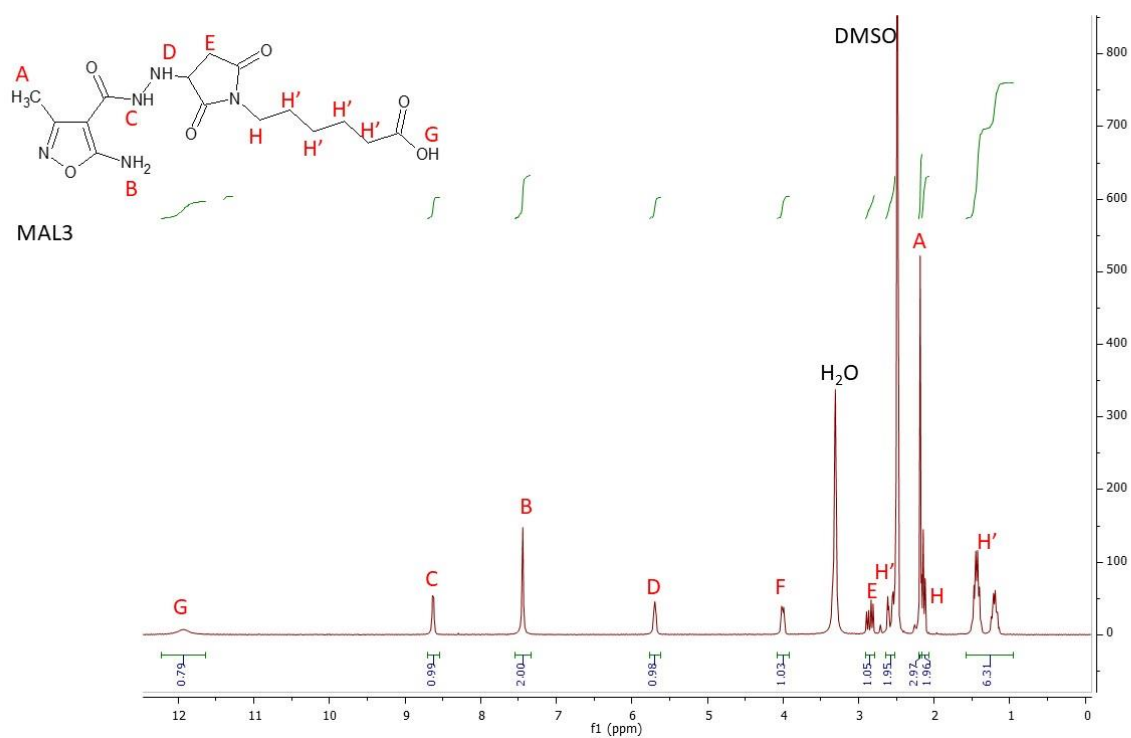

Figure S7. <sup>1</sup>H NMR spectrum of compound MAL3

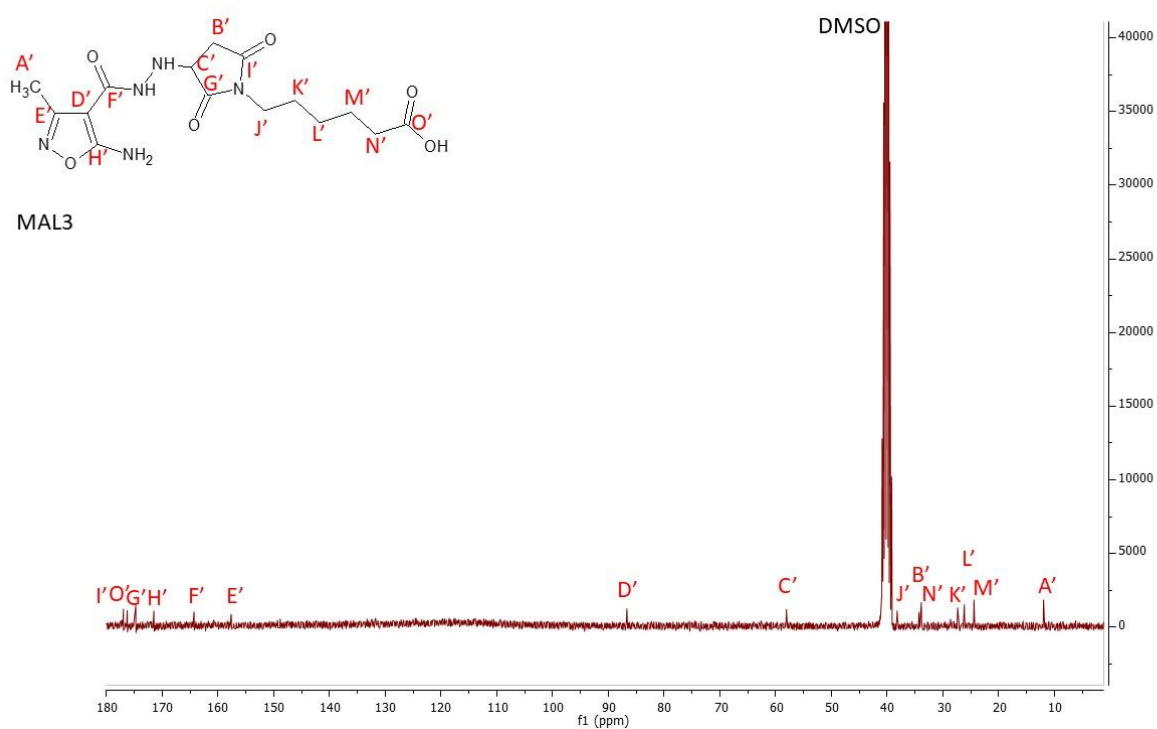

Figure S8. <sup>13</sup>C NMR spectrum of compound MAL3

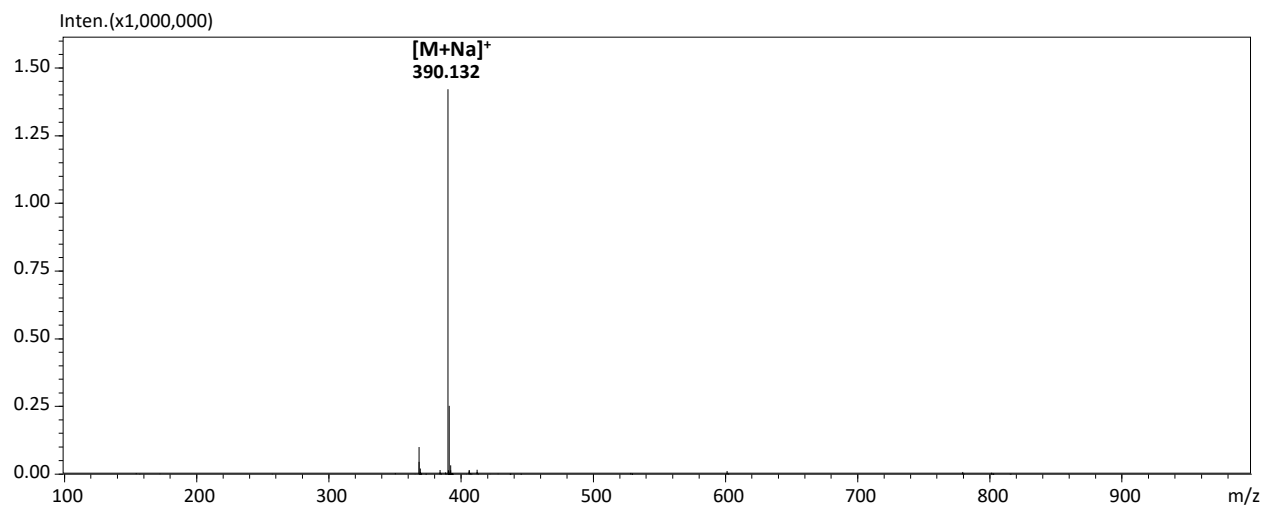

Figure S9. ESI-MS spectrum of compound MAL3

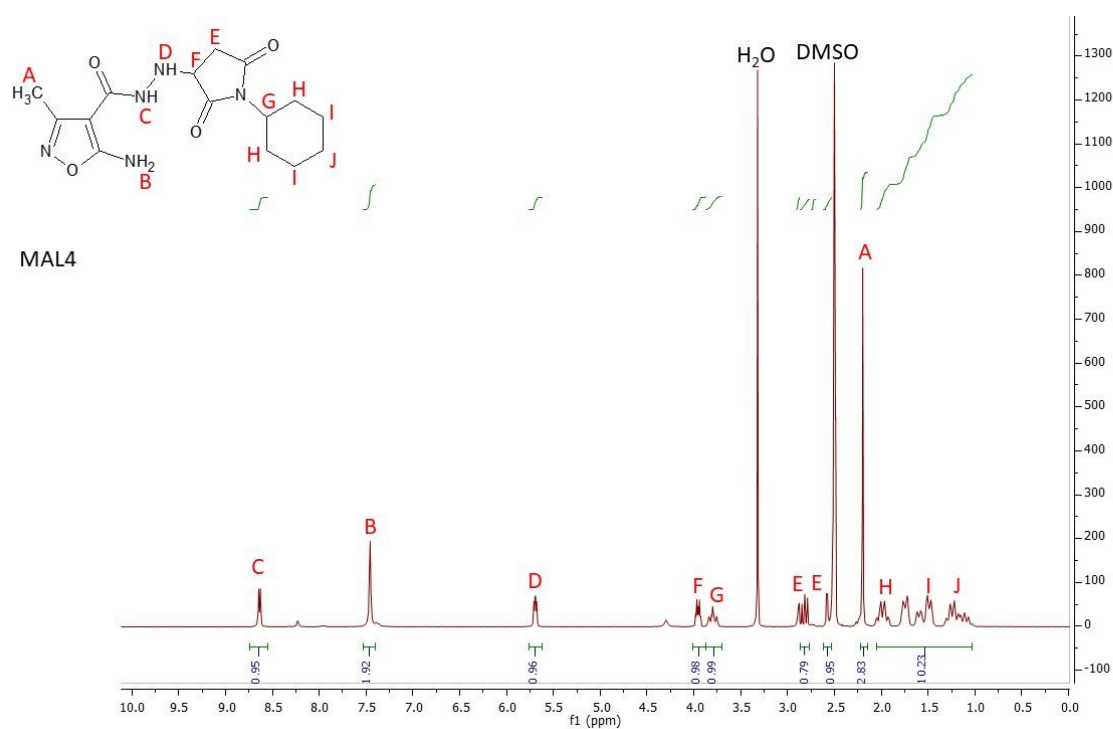

Figure S10.  $^1H$  NMR spectrum of compound MAL4

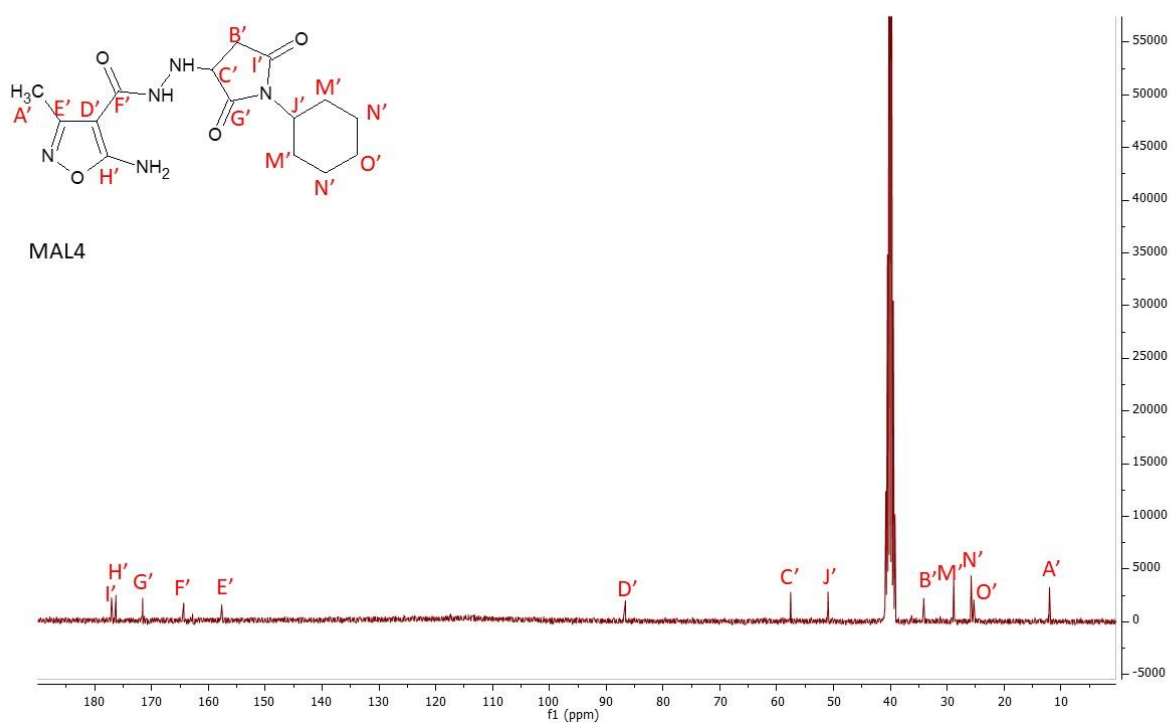

Figure S11.  $^{13}\text{C}$  NMR spectrum of compound MAL4

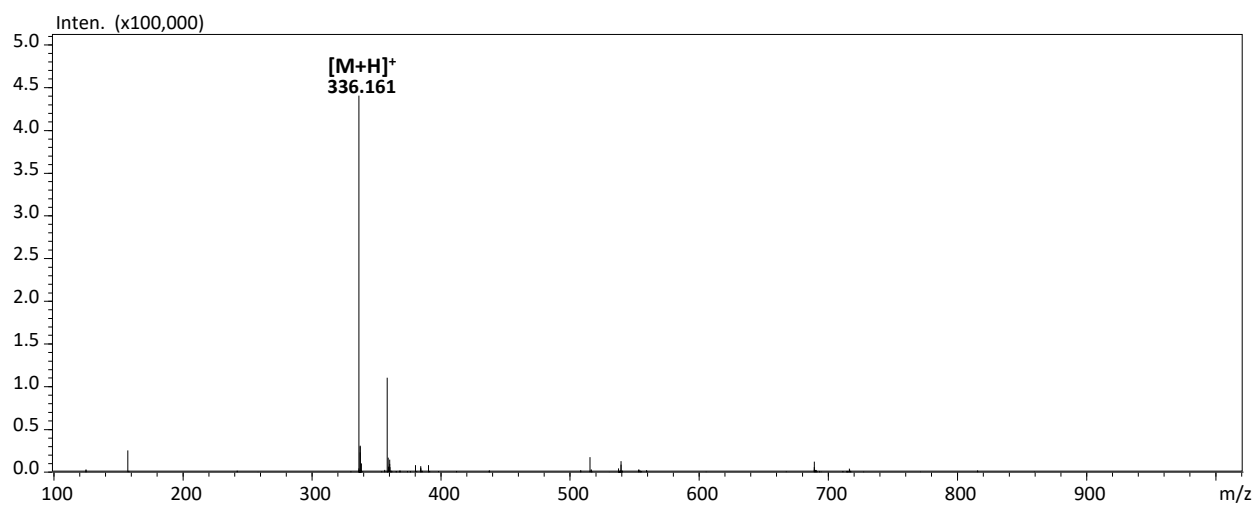

Figure S12. ESI-MS spectrum of compound MAL4



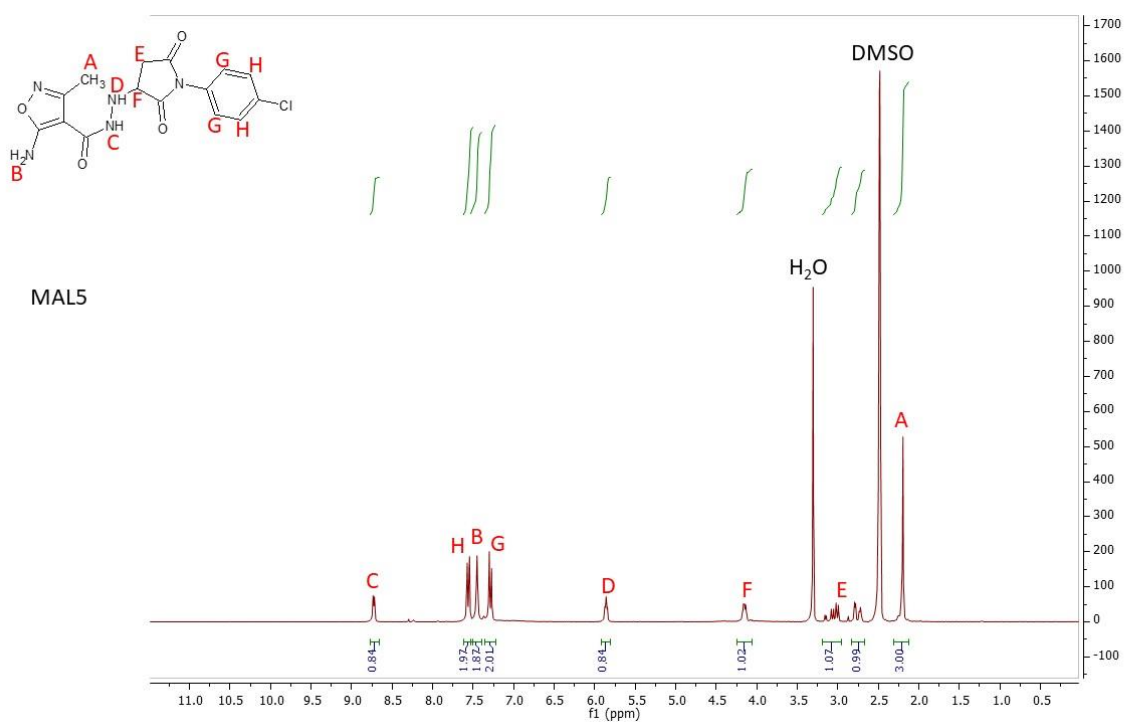

**Figure S13. <sup>1</sup>H NMR spectrum of compound MAL5**

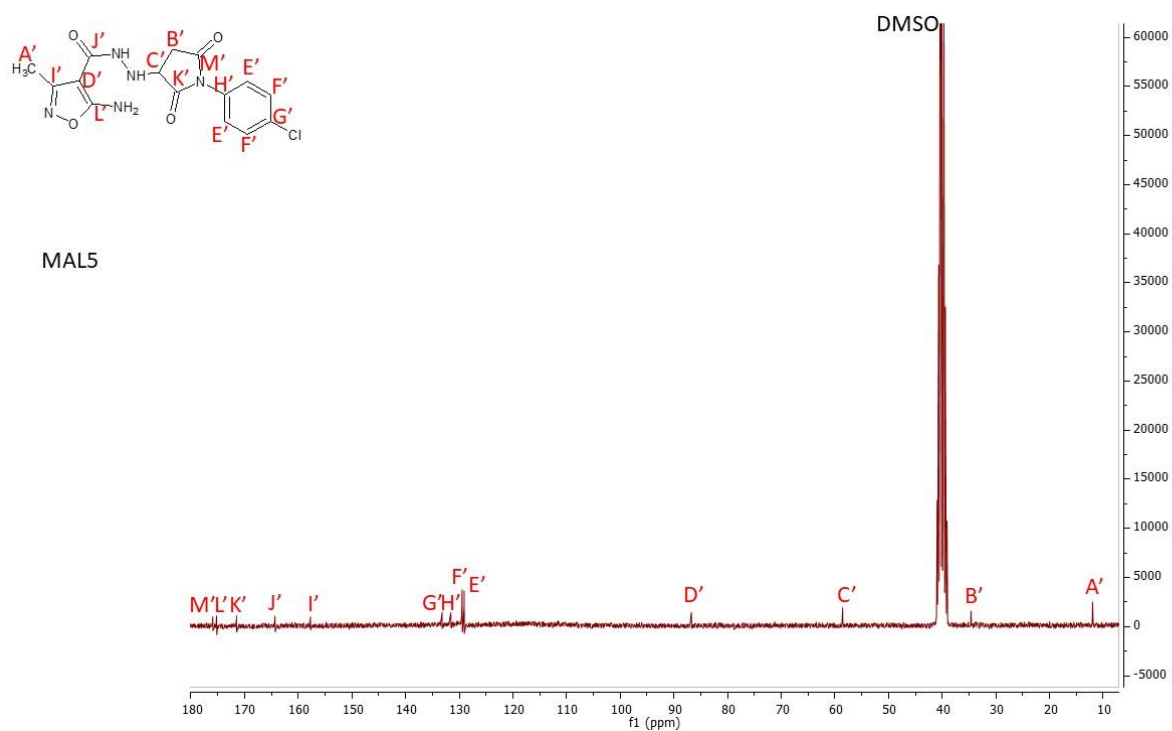

**Figure S14. <sup>13</sup>C NMR spectrum of compound MAL5**

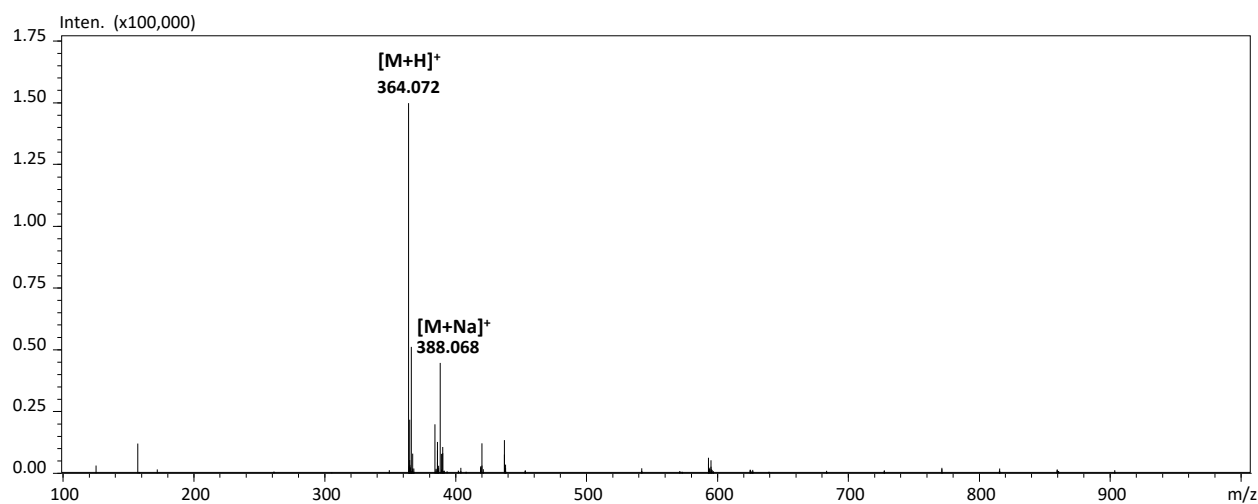

Figure S15. ESI-MS spectrum of compound MAL5

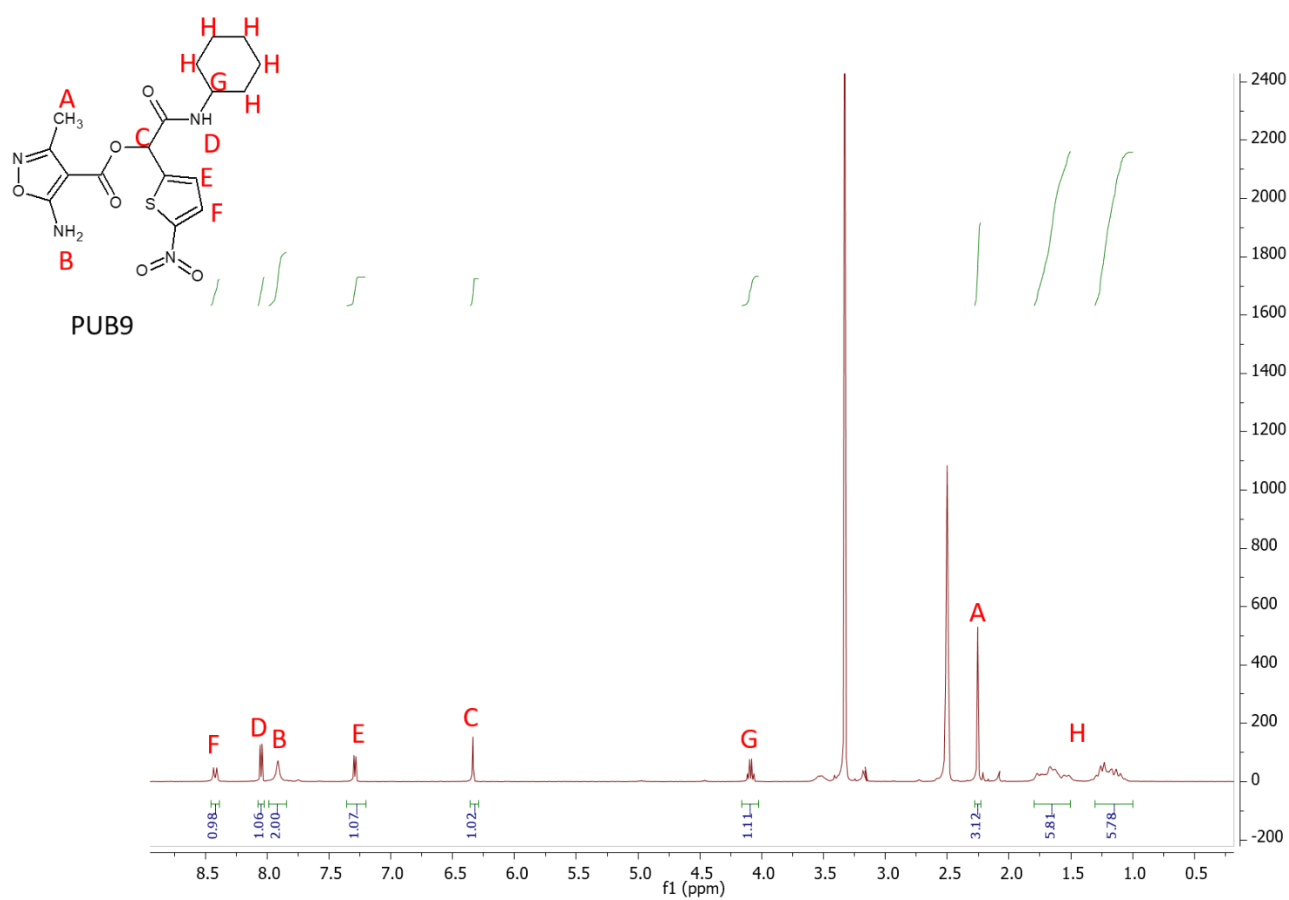

Figure S16. <sup>1</sup>H NMR spectrum of compound PUB9

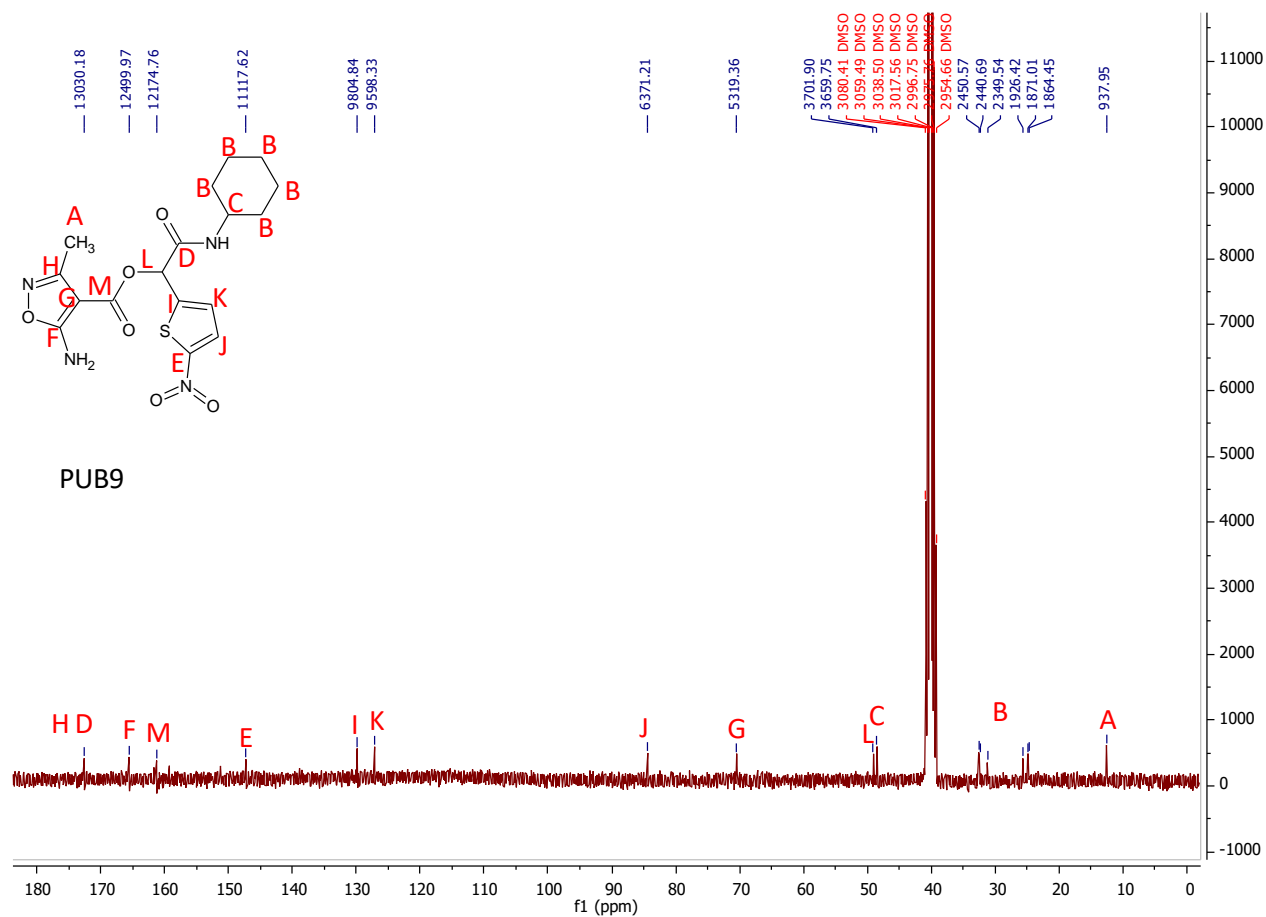

Figure S17. <sup>13</sup>C NMR spectrum of compound PUB9

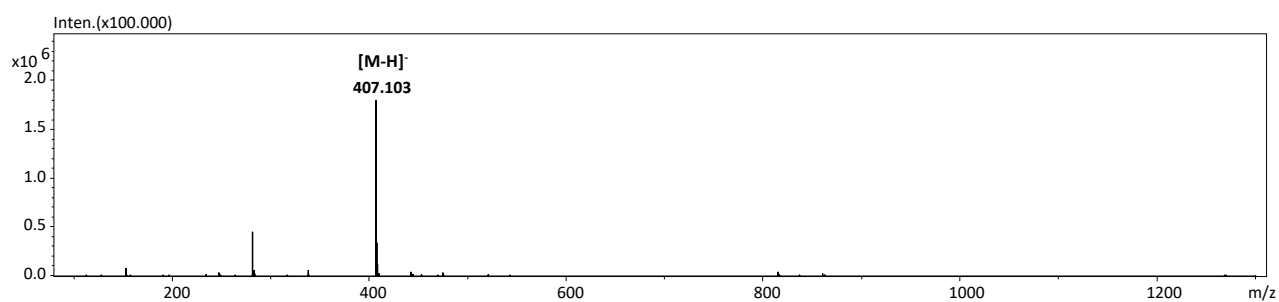

Figure S18. ESI-MS spectrum of compound PUB9

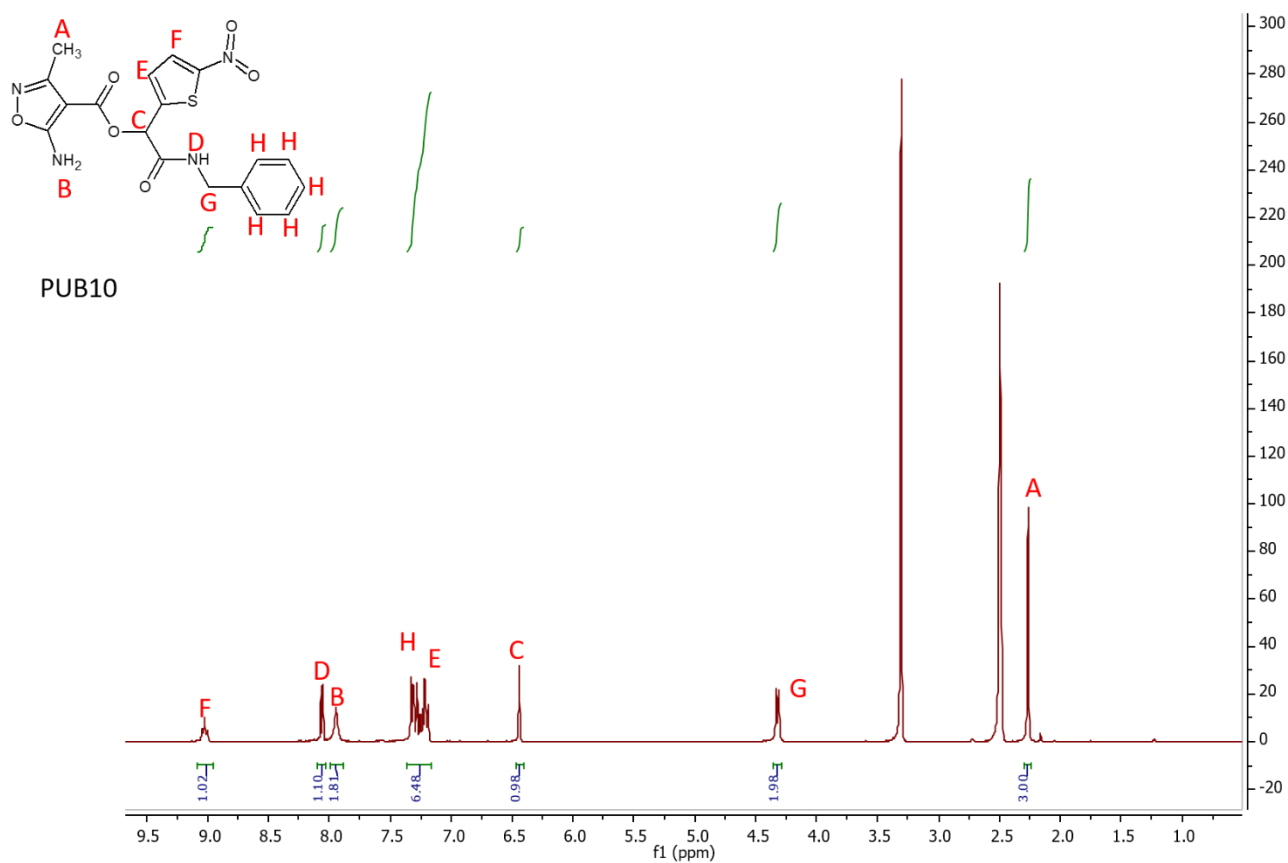

Figure S19. <sup>1</sup>H NMR spectrum of compound PUB10

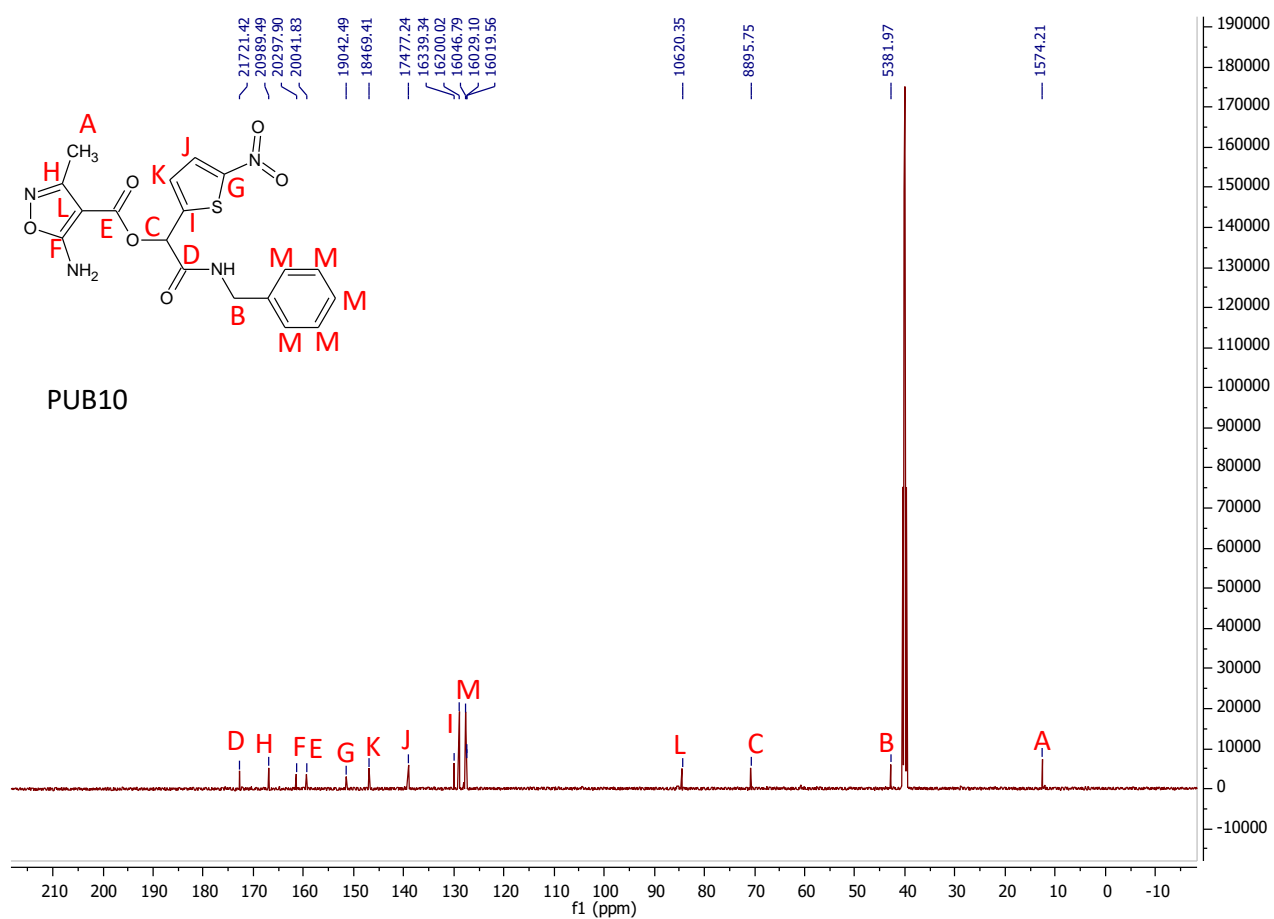

Figure S20. <sup>13</sup>C NMR spectrum of compound PUB10

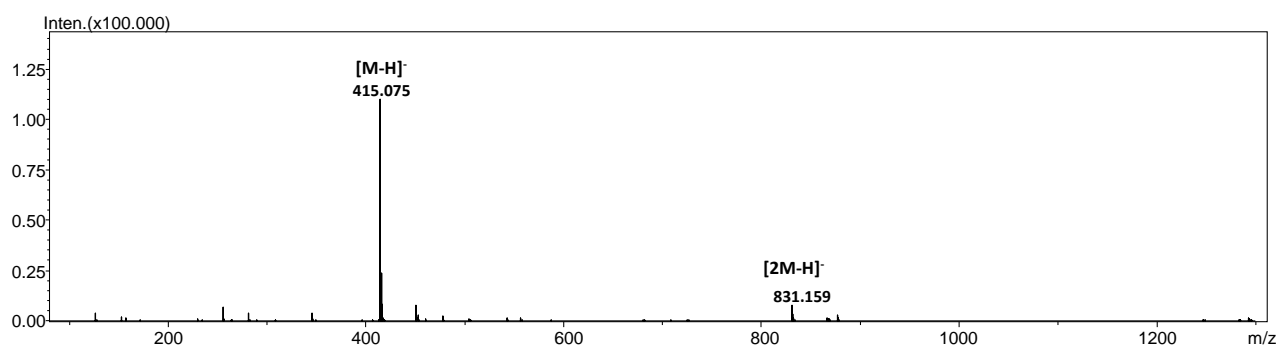

**Figure S21.** ESI-MS spectrum of compound PUB10

**Table S1.** The values of Minimal Inhibitory Concentration (MIC), Minimal Biofilm Eradication Concentration (MBEC) and Antibiofilm Dressing Activity Measurement (A.D.A.M.) performed for octenidine dihydrochloride-based antiseptic agent (method's usability control).

|                           | <i>S.aureus</i> | <i>P.aeruginosa</i> | <i>C.albicans</i> |
|---------------------------|-----------------|---------------------|-------------------|
| MIC [mg/L]                | 1               | 0,78                | 1                 |
| MBEC [mg/L]               | 62,5            | 1000                | 62,5              |
| A.D.A.M.<br>[%]reduction] | 98              | 95                  | 89                |
